# Supplementary material for: Multiple Modes of Cell Death Discovered in a Prokaryotic (Cyanobacterial) Endosymbiont
Source: PLoS One. 2013 Jun 18;8(6):e66147. doi: 10.1371/journal.pone.0066147 (PMC3688857; doi:10.1371/journal.pone.0066147)
Supplement: Table S1 — Results of BLASTP search against the nr database (Dec 6, 2011) using ACM79336.1 as query. (XLS) [file pone.0066147.s008.xls]

## Sheet: Sheet1
Table S1
Results of BLASTP search against the nr database (Dec 6, 2011) using ACM79336.1 as query. Top 99 hits are shown
E-value threshold = 0.01
Protein	Product	Organism	Taxonomy	Max score	Total score	Query coverage	E-value	Max identity
YP_003720883.1	peptidase C14 caspase catalytic subunit p20	'Nostoc azollae' 0708	cyanobacteria	312	312	99%	4e-101	97%
ADO19137.1	peptidase C14	Nostoc flagelliforme str. Sunitezuoqi	cyanobacteria	182	182	98%	9e-52	65%
ZP_01631255.1	Peptidase C14, caspase catalytic subunit p20	Nodularia spumigena CCY9414	cyanobacteria	179	179	98%	9e-51	55%
YP_001868699.1	peptidase C14, caspase catalytic subunit p20	Nostoc punctiforme PCC 73102	cyanobacteria	161	161	98%	4e-44	61%
ZP_08984891.1	peptidase C14 caspase catalytic subunit p20	Fischerella sp. JSC-11	cyanobacteria	160	160	98%	2e-43	56%
YP_322894.1	peptidase C14	Anabaena variabilis ATCC 29413	cyanobacteria	153	153	98%	3e-41	56%
NP_489177.1	hypothetical protein all5137	Nostoc sp. PCC 7120	cyanobacteria	152	152	98%	9e-41	55%
ZP_06307128.1	Peptidase C14, caspase catalytic subunit p20	Cylindrospermopsis raciborskii CS-505	cyanobacteria	136	136	97%	5e-35	51%
YP_722292.1	peptidase C14, caspase catalytic subunit p20	Trichodesmium erythraeum IMS101	cyanobacteria	135	135	85%	8e-35	50%
ZP_06304585.1	Peptidase C14, caspase catalytic subunit p20	Raphidiopsis brookii D9	cyanobacteria	124	124	91%	1e-30	53%
ZP_08494506.1	peptidase C14 caspase catalytic subunit p20	Microcoleus vaginatus FGP-2	cyanobacteria	122	122	82%	5e-30	48%
ZP_05025918.1	caspase domain protein	Microcoleus chthonoplastes PCC 7420	cyanobacteria	119	119	84%	3e-29	45%
YP_003890380.1	peptidase C14 caspase catalytic subunit p20	Cyanothece sp. PCC 7822	cyanobacteria	119	119	91%	4e-29	45%
YP_002376083.1	peptidase C14 caspase catalytic subunit p20	Cyanothece sp. PCC 7424	cyanobacteria	117	117	84%	3e-28	48%
ZP_03271950.1	peptidase C14 caspase catalytic subunit p20	Arthrospira maxima CS-328	cyanobacteria	110	110	73%	8e-26	48%
ZP_06383780.1	peptidase C14, caspase catalytic subunit p20	Arthrospira platensis str. Paraca	cyanobacteria	108	108	73%	3e-25	49%
BAI88513.1	hypothetical protein	Arthrospira platensis NIES-39	cyanobacteria	108	108	73%	3e-25	49%
YP_001806071.1	putative peptidase C14, caspase catalytic	Cyanothece sp. ATCC 51142	cyanobacteria	106	106	96%	2e-24	41%
ZP_08430024.1	caspase domain protein	Lyngbya majuscula 3L	cyanobacteria	106	106	82%	2e-24	48%
YP_003136357.1	peptidase C14 caspase catalytic subunit p20	Cyanothece sp. PCC 8802	cyanobacteria	105	105	75%	4e-24	47%
YP_002370804.1	peptidase C14 caspase catalytic subunit p20	Cyanothece sp. PCC 8801	cyanobacteria	105	105	75%	4e-24	47%
ZP_01731395.1	Peptidase C14, caspase catalytic subunit p20	Cyanothece sp. CCY0110	cyanobacteria	104	104	74%	6e-24	45%
ZP_00518007.1	Caspase-1, p20	Crocosphaera watsonii WH 8501	cyanobacteria	100	100	96%	2e-22	38%
EHJ10745.1	Peptidase C14, caspase catalytic subunit p20	Crocosphaera watsonii WH 0003	cyanobacteria	100	100	96%	2e-22	38%
YP_003421879.1	Caspase domain-containing protein	cyanobacterium UCYN-A	cyanobacteria	95.9	95.9	91%	8e-21	36%
ZP_07109072.1	putative Peptidase C14, caspase catalytic subunit p20	Oscillatoria sp. PCC 6506	cyanobacteria	92.4	92.4	73%	1e-19	49%
CAO87907.1	unnamed protein product	Microcystis aeruginosa PCC 7806	cyanobacteria	92.4	92.4	96%	1e-19	39%
ZP_01620594.1	Peptidase C14, caspase catalytic subunit p20	Lyngbya sp. PCC 8106	cyanobacteria	92	92	84%	2e-19	46%
YP_001870016.1	peptidase C14, caspase catalytic subunit p20	Nostoc punctiforme PCC 73102	cyanobacteria	82.8	82.8	84%	3e-16	35%
ZP_05028920.1	caspase domain protein	Microcoleus chthonoplastes PCC 7420	cyanobacteria	81.6	81.6	87%	6e-16	33%
YP_001656752.1	peptidase C14, caspase catalytic subunit P20	Microcystis aeruginosa NIES-843	cyanobacteria	81.6	81.6	73%	7e-16	40%
ZP_05031351.1	caspase domain protein	Microcoleus chthonoplastes PCC 7420	cyanobacteria	81.3	81.3	84%	1e-15	36%
ZP_01619141.1	Peptidase C14, caspase catalytic subunit p20	Lyngbya sp. PCC 8106	cyanobacteria	79.7	79.7	84%	2e-15	34%
YP_001518857.1	protease (caspase) p20 domain-containing protein	Acaryochloris marina MBIC11017	cyanobacteria	77	77	74%	3e-14	35%
BAI89862.1	hypothetical protein	Arthrospira platensis NIES-39	cyanobacteria	76.3	76.3	73%	4e-14	34%
ZP_03276405.1	peptidase C14 caspase catalytic subunit p20	Arthrospira maxima CS-328	cyanobacteria	76.3	76.3	73%	5e-14	34%
YP_001657501.1	peptidase C14, caspase catalytic subunit P20	Microcystis aeruginosa NIES-843	cyanobacteria	75.9	75.9	74%	7e-14	38%
ZP_05038701.1	caspase domain protein	Synechococcus sp. PCC 7335	cyanobacteria	73.9	73.9	75%	3e-13	36%
YP_476869.1	C14 family peptidase	Synechococcus sp. JA-2-3B'a(2-13)	cyanobacteria	73.2	73.2	97%	6e-13	30%
ZP_06380571.1	peptidase C14, caspase catalytic subunit p20	Arthrospira platensis str. Paraca	cyanobacteria	72.4	72.4	73%	8e-13	33%
YP_001869994.1	peptidase C14, caspase catalytic subunit p20	Nostoc punctiforme PCC 73102	cyanobacteria	71.6	71.6	67%	2e-12	37%
YP_474140.1	ICE-like protease	Synechococcus sp. JA-3-3Ab	cyanobacteria	69.7	69.7	79%	1e-11	32%
ZP_05028664.1	caspase domain protein	Microcoleus chthonoplastes PCC 7420	cyanobacteria	69.3	69.3	67%	1e-11	35%
ZP_05038848.1	caspase domain protein	Synechococcus sp. PCC 7335	cyanobacteria	68.9	68.9	64%	2e-11	36%
ZP_01622039.1	Peptidase C14, caspase catalytic subunit p20	Lyngbya sp. PCC 8106	cyanobacteria	68.6	68.6	86%	2e-11	34%
ZP_05023300.1	caspase domain protein	Microcoleus chthonoplastes PCC 7420	cyanobacteria	68.2	68.2	64%	3e-11	35%
YP_001733372.1	ICE-like protease	Synechococcus sp. PCC 7002	cyanobacteria	59.7	59.7	84%	3e-08	32%
YP_425955.1	peptidase C14, caspase catalytic subunit p20	Rhodospirillum rubrum ATCC 11170	a-proteobacteria	58.9	58.9	66%	4e-08	34%
AEO47366.1	peptidase C14, caspase catalytic subunit p20	Rhodospirillum rubrum F11	a-proteobacteria	58.9	58.9	66%	4e-08	34%
YP_399315.1	hypothetical protein Synpcc7942_0296	Synechococcus elongatus PCC 7942	cyanobacteria	58.9	58.9	30%	4e-08	56%
YP_171926.1	hypothetical protein syc1216_c	Synechococcus elongatus PCC 6301	cyanobacteria	58.9	58.9	30%	5e-08	56%
XP_001829643.2	metacaspase	Coprinopsis cinerea okayama7#130	Fungi	53.5	53.5	71%	3e-06	32%
XP_003543919.1	PREDICTED: metacaspase-1-like	Glycine max	Viridiplantae	52.8	52.8	66%	6e-06	28%
XP_002525861.1	caspase, putative	Ricinus communis	Viridiplantae	52	52	66%	1e-05	31%
XP_002465186.1	hypothetical protein SORBIDRAFT_01g033610	Sorghum bicolor	Viridiplantae	50.1	50.1	78%	5e-05	31%
XP_003170739.1	metacaspase-1	Arthroderma gypseum CBS 118893	Fungi	49.7	49.7	66%	7e-05	28%
CCA73585.1	related to metacaspase 2	Piriformospora indica	Fungi	49.7	49.7	71%	8e-05	29%
XP_003034935.1	hypothetical protein SCHCODRAFT_74136	Schizophyllum commune H4-8	Fungi	49.3	49.3	66%	9e-05	29%
XP_001760554.1	predicted protein	Physcomitrella patens subsp. patens	Viridiplantae	49.3	49.3	69%	8e-05	28%
XP_002490561.1	Putative cysteine protease similar to mammalian caspases	Komagataella pastoris GS115	Fungi	48.9	48.9	66%	1e-04	26%
XP_504976.1	YALI0F04059p	Yarrowia lipolytica	Fungi	48.9	48.9	66%	1e-04	29%
CCD24979.1	hypothetical protein NDAI_0E01630	Naumovozyma dairenensis CBS 421	Fungi	48.9	48.9	66%	1e-04	28%
YP_002249695.1	polysaccharide deacetylase,	Thermodesulfovibrio yellowstonii DSM 11347	Nitrospirae	48.9	48.9	60%	1e-04	32%
XP_002323764.1	predicted protein	Populus trichocarpa	Viridiplantae	48.5	48.5	66%	2e-04	32%
YP_323749.1	peptidase C14	Anabaena variabilis ATCC 29413	cyanobacteria	48.1	48.1	73%	2e-04	31%
XP_002277456.1	PREDICTED: hypothetical protein	Vitis vinifera	Viridiplantae	48.1	48.1	66%	2e-04	31%
YP_001530780.1	peptidase C14 caspase catalytic subunit p20	Desulfococcus oleovorans Hxd3	d-proteobacteria	47.8	47.8	61%	4e-04	31%
A5D9W7.2	RecName: Full=Metacaspase-1; Flags: Precursor	Meyerozyma guilliermondii ATCC 6260	Fungi	47.8	47.8	66%	4e-04	26%
ABR16605.1	unknown	Picea sitchensis	Viridiplantae	47.8	47.8	66%	3e-04	29%
ZP_01549041.1	Peptidase C14, caspase catalytic subunit p20	Stappia aggregata IAM 12614	a-proteobacteria	47.4	47.4	66%	5e-04	25%
XP_001486695.1	hypothetical protein PGUG_00072	Meyerozyma guilliermondii ATCC 6260	Fungi	47.4	47.4	66%	4e-04	26%
XP_772999.1	hypothetical protein CNBJ2750	Cryptococcus neoformans var. neoformans B-3501A	Fungi	47.4	47.4	66%	5e-04	27%
XP_003193937.1	metacaspase	Cryptococcus gattii WM276	Fungi	47.4	47.4	66%	5e-04	26%
ABD28668.1	Peptidase C14, caspase catalytic subunit p20	Medicago truncatula	Viridiplantae	47.4	47.4	65%	4e-04	29%
CBI38551.3	unnamed protein product	Vitis vinifera	Viridiplantae	47.4	47.4	66%	4e-04	31%
CAN66365.1	hypothetical protein VITISV_034059	Vitis vinifera	Viridiplantae	47.4	47.4	66%	4e-04	31%
XP_462508.2	DEHA2G22176p	Debaryomyces hansenii CBS767	Fungi	46.6	46.6	66%	7e-04	23%
XP_003034936.1	hypothetical protein SCHCODRAFT_105192	Schizophyllum commune H4-8	Fungi	46.6	46.6	66%	8e-04	32%
XP_002525860.1	caspase, putative	Ricinus communis	Viridiplantae	46.6	46.6	66%	6e-04	27%
XP_002307934.1	predicted protein	Populus trichocarpa	Viridiplantae	46.6	46.6	65%	7e-04	28%
EGX43290.1	hypothetical protein AOL_s00215g26	Arthrobotrys oligospora ATCC 24927	Fungi	46.2	46.2	66%	0.001	28%
XP_002456486.1	hypothetical protein SORBIDRAFT_03g037160	Sorghum bicolor	Viridiplantae	46.2	46.2	68%	0.001	28%
NP_001142392.1	uncharacterized protein LOC100274565	Zea mays	Viridiplantae	46.2	46.2	68%	0.001	28%
XP_001746462.1	hypothetical protein	Monosiga brevicollis MX1	Choanoflagellida	45.8	45.8	67%	0.002	27%
XP_002871080.1	hypothetical protein ARALYDRAFT_908304	Arabidopsis lyrata subsp. lyrata	Viridiplantae	45.8	45.8	65%	0.001	28%
XP_001764027.1	predicted protein	Physcomitrella patens subsp. patens	Viridiplantae	45.8	45.8	66%	0.001	31%
BAJ91232.1	predicted protein	Hordeum vulgare subsp. vulgare	Viridiplantae	45.8	45.8	67%	0.001	26%
NP_441876.1	hypothetical protein sll0148	Synechocystis sp. PCC 6803	cyanobacteria	45.4	45.4	63%	0.002	33%
XP_002553128.1	KLTH0D09614p	Lachancea thermotolerans	Fungi	45.4	45.4	66%	0.002	26%
ABK26561.1	unknown	Picea sitchensis	Viridiplantae	45.4	45.4	66%	0.002	28%
AAC24380.1	Unknown protein	Arabidopsis thaliana	Viridiplantae	45.4	45.4	79%	0.002	29%
YP_002030424.1	polysaccharide deacetylase	Stenotrophomonas maltophilia R551-3	g-proteobacteria	45.1	45.1	63%	0.003	28%
XP_003532612.1	PREDICTED: LOW QUALITY PROTEIN: metacaspase-1-like	Glycine max	Viridiplantae	45.1	45.1	57%	0.002	28%
XP_003568187.1	PREDICTED: metacaspase-5-like	Brachypodium distachyon	Viridiplantae	45.1	45.1	67%	0.002	27%
ABR16279.1	unknown	Picea sitchensis	Viridiplantae	45.1	45.1	66%	0.002	29%
XP_002283757.1	PREDICTED: hypothetical protein	Vitis vinifera	Viridiplantae	45.1	45.1	65%	0.003	28%
CCC93448.1	metacaspase MCA4	Trypanosoma congolense IL3000	Euglenozoa	44.7	44.7	43%	0.003	32%
CBI32852.3	unnamed protein product	Vitis vinifera	Viridiplantae	44.7	44.7	65%	0.003	27%
XP_002864889.1	latex-abundant family protein	Arabidopsis lyrata subsp. lyrata	Viridiplantae	44.7	44.7	53%	0.003	32%
